# Supplementary material for: International consensus guidance for management of myasthenia gravis: Executive summary
Source: PubMed Central journal article supplement — Neurology. 2016 Jul 26;87(4):419–25. doi: 10.1212/WNL.0000000000002790 (PMC4977114; doi:10.1212/wnl.0000000000002790), 2016-07-26
Supplement: supp_WNL.0000000000002790_Table_e-1.pdf [file supp_WNL.0000000000002790_Table_e-1.pdf]

**Table e-1 Pharmacological management of MG\***

| <b>Agent</b>   | <b>Initial dose</b>                                                               | <b>Maintenance dose</b>                                                                         | <b>Onset of Action</b> | <b>Major Adverse Events</b>                                                                                                                | <b>Monitoring</b>                                                                                                                                                 | <b>Comments</b>                                                                                                                                                                                    |
|----------------|-----------------------------------------------------------------------------------|-------------------------------------------------------------------------------------------------|------------------------|--------------------------------------------------------------------------------------------------------------------------------------------|-------------------------------------------------------------------------------------------------------------------------------------------------------------------|----------------------------------------------------------------------------------------------------------------------------------------------------------------------------------------------------|
| Pyridostigmine | 30-60 mg tid <sup>1, 2</sup>                                                      | 60-120 mg tid to 5x/day, adjusted based on symptoms, typically not to exceed 480 mg/day.        | 15-30 minutes          | Stomach cramps, nausea, vomiting, diarrhea, muscle twitching and cramps, sweating, salivation, blurred vision                              | Use the minimal amount that produces clinical improvement; this is best achieved by using a dose that produces observable improvement after most administrations. | Can counter muscarinic adverse events with anticholinergic agents (i.e. glycopyrrolate 1 mg; hyoscyamine sulfate 0.125 mg; propantheline 15 mg) or loperamide, an opioid receptor agonist, 2-4 mg. |
| Prednisone     | Option 1: 10-20 mg/day, increasing daily dose by 5 mg daily equivalent every week | Slow alternate day taper after treatment goal achieved for several days; taper by 5 mg/day dose | 2-4 weeks              | Hypertension, diabetes, weight gain, bone loss, cataracts, GI ulcers, glaucoma, neuropsychiatric symptoms, growth retardation in children, | HbA1C every few months, blood pressure checks, bone density monitoring, eye exam for glaucoma and cataracts.                                                      | Administer in single morning dose; temporary worsening is seen in up to 50% of pts starting on high doses and in some patients on lower doses; IVIg or                                             |

|                     |                                                                                                                             |                                                                                                                                                                                       |                                                                                           |                                                                                                 |                                                                              |                                                                                                                                                                                     |
|---------------------|-----------------------------------------------------------------------------------------------------------------------------|---------------------------------------------------------------------------------------------------------------------------------------------------------------------------------------|-------------------------------------------------------------------------------------------|-------------------------------------------------------------------------------------------------|------------------------------------------------------------------------------|-------------------------------------------------------------------------------------------------------------------------------------------------------------------------------------|
|                     | <p>until treatment goal achieved. Option 2: Start at 50-80 mg/day; this approach may require inpatient hospitalization.</p> | <p>equivalent per month. Taper more slowly once <math>\leq 10</math> mg/day dose equivalent. Continuing a low dose long-term can help to maintain the treatment goal.<sup>3</sup></p> |                                                                                           | <p>hypothalamic-pituitary axis suppression</p>                                                  |                                                                              | <p>PLEX may prevent steroid-induced worsening.</p>                                                                                                                                  |
| <p>Azathioprine</p> | <p>50 mg/day</p>                                                                                                            | <p>Increase by 50 mg increments every 1-2 weeks to target of 2.5-3 mg/kg/day.</p>                                                                                                     | <p>2-10 months for initial response. Up to 24 months for maximum benefit.<sup>4</sup></p> | <p>Fever, abdominal pain, nausea, vomiting, anorexia, leukopenia, hepatotoxicity, skin rash</p> | <p>CBC, LFTs 1-4 times in first month, then monthly to every third month</p> | <p>10% of patients cannot tolerate because of flu-like reaction; major drug interaction with allopurinol; TPMT enzyme testing can be performed, if available, prior to starting</p> |

|                       |            |                                                             |                          |                                                                                        |                                                                                                                                        |                                                                                                                                                                           |
|-----------------------|------------|-------------------------------------------------------------|--------------------------|----------------------------------------------------------------------------------------|----------------------------------------------------------------------------------------------------------------------------------------|---------------------------------------------------------------------------------------------------------------------------------------------------------------------------|
|                       |            |                                                             |                          |                                                                                        |                                                                                                                                        | treatment to identify patients at high risk of bone marrow suppression.                                                                                                   |
| Cyclosporin           | 100 mg bid | Increase slowly as needed to 3-6 mg/kg/day on bid schedule. | 1-3 months               | Hirsutism, tremor, gum hyperplasia, hypertension, hepatotoxicity, nephrotoxicity, PRES | CBC, LFTs, BUN/Cr monthly x3, then every three months; monitor trough drug levels.                                                     | Bioequivalence differs between preparations so avoid brand switching when possible; grapefruit juice may increase blood level; high potential for drug-drug interactions. |
| Mycophenolate mofetil | 500 mg bid | 1000 to 1500 mg bid.                                        | 2-12 months <sup>5</sup> | Diarrhea, vomiting, leukopenia, teratogenicity (black box warning)                     | CBC weekly for 4 weeks, q2 weeks for 4 weeks, then monthly to every third month; REMS program when used in women of child bearing age. | Diarrhea may resolve by change to tid dosing.                                                                                                                             |

|                  |                                                              |                                                                                   |            |                                                                                                                                               |                                                                                                                                       |                                                                                                                                      |
|------------------|--------------------------------------------------------------|-----------------------------------------------------------------------------------|------------|-----------------------------------------------------------------------------------------------------------------------------------------------|---------------------------------------------------------------------------------------------------------------------------------------|--------------------------------------------------------------------------------------------------------------------------------------|
| Cyclophosphamide | (1) Oral: 50 mg/day<br>(2) IV: 500 mg/m <sup>2</sup> monthly | Oral: increase by 50 mg/week to maintenance dose of 2-3 mg/kg/day.                | 2-6 months | Alopecia, leukopenia, nausea and vomiting, skin discoloration, anorexia hemorrhagic cystitis, malignancy                                      | CBC, BUN/Cr, electrolytes, LFTs, urinalysis every 2-4 weeks.                                                                          | Intravenous pulse therapy may be less toxic because cumulative dose is lower                                                         |
| Tacrolimus       | 3-5 mg/day or 0.1 mg/kg/day                                  | Increase dosing as needed for response following trough levels (see last column). | 1-3 months | Hyperglycemia, hypertension, headache, hyperkalemia, nephrotoxicity, diarrhea, nausea, vomiting, PRES                                         | BUN/Cr, glucose, K+; trough drug levels every few weeks initially, then less frequently                                               | Insulin-dependent diabetes mellitus developed in 20% of post-renal transplant patients; trough levels of 8-9 ng/ml may be effective. |
| Methotrexate     | 10 mg weekly for 2 weeks <sup>6</sup>                        | Increase by 5 mg every two weeks to a maximum dose of 15-25 mg weekly.            | 2-6 months | Leukopenia, mouth ulceration, nausea, diarrhea, headaches, hair loss, hepatotoxicity, pulmonary fibrosis, rare nephrotoxicity, teratogenicity | CBC, LFTs monthly initially, then at least every 3 months. Monitor periodically for interstitial lung disease, a rare occurrence with | Consider folic acid 5 mg/day to reduce toxicity. Absolutely contra-indicated in pregnancy.                                           |

|                                   |                       |                                                                         |           |                                                                                                             |                                                              |                                                                                                                                                                                                                                                           |
|-----------------------------------|-----------------------|-------------------------------------------------------------------------|-----------|-------------------------------------------------------------------------------------------------------------|--------------------------------------------------------------|-----------------------------------------------------------------------------------------------------------------------------------------------------------------------------------------------------------------------------------------------------------|
|                                   |                       |                                                                         |           |                                                                                                             | doses used for immunotherapy.                                |                                                                                                                                                                                                                                                           |
| Intravenous immunoglobulin (IVIg) | 2 gm/kg over 2-5 days | 0.4-1 gm/kg every 4 weeks; can attempt to decrease frequency over time. | 1-2 weeks | Headache, aseptic meningitis, nephrotoxicity, ischemic events, fluid overload, leukopenia, thrombocytopenia | BUN/Cr every month, decreasing to every 3rd month over time. | IgA level prior to starting treatment may be useful to identify congenital IgA deficiency, a contraindication to IVIg use; avoid in patients with recent thrombotic/ ischemic event. Use sucrose-free formulation for patients at risk of renal toxicity. |

**Abbreviations: BUN = blood urea nitrogen; CBC = complete blood count; Cr = Creatinine; GI = gastrointestinal; HbA1C = hemoglobin A1C; IgA = immunoglobulin A; IVIg = intravenous immunoglobulin; K<sup>+</sup> = potassium; LFTs = liver function tests; PLEX = plasma exchange; PRES = posterior reversible encephalopathy syndrome; REMS = risk evaluation and mitigation strategy; TPMT = thiopurine methyltransferase.**

**\*Precise dosing varies between practitioners. This table is intended to provide guidance and should not be interpreted as a rigid directive in regard to dosing and monitoring.**

## References

1. Massey JM. Acquired myasthenia gravis. *Neurol Clin* 1997;15:577-595.
2. Turner C. A review of myasthenia gravis: Pathogenesis, clinical features and treatment. *Curr Anaesth Crit Care* 2007;18:15-23.
3. Murai H. Japanese clinical guidelines for myasthenia gravis: Putting into practice. *Clin Exp Neuroimmunol* 2015;6:21-31.
4. Palace J, Newsom-Davis J, Lecky B, The Myasthenia Gravis Study Group. A randomized double-blind trial of prednisolone alone or with azathioprine in myasthenia gravis. *Neurology* 1998;50:1778-1783.
5. Hehir MK, Burns TM, Alpers JP, Conaway MR, Sawa M, Sanders DB. Mycophenolate mofetil in AChR-antibody positive myasthenia gravis: Outcomes in 102 patients. *Muscle Nerve* 2010;41:593-598.
6. Pasnoor M, He J, Herbelin L, Dimachkie M, Barohn RJ, The Muscle Study Group. Phase II trial of methotrexate in myasthenia gravis. *Ann NY Acad Sci* 2012;1275:23-28.
